# Supplementary material
Source: ML conference proceedings conference paper supplement (https://proceedings.neurips.cc/paper_files/paper/2019/hash/9f9e8cba3700df6a947a8cf91035ab84-Abstract.html)
Supplement: Supplementary file [file 9f9e8cba3700df6a947a8cf91035ab84-Supplemental.zip]

## Supplementary Materials

### A Useful Lemmas for Proof of Theorem 1

For the SARSA algorithm, define for any  $\theta \in \mathbb{R}^N$ ,

$$\bar{g}(\theta) = \mathbb{E}_\theta [\phi(X, A) (r(X, A) + \gamma \phi^T(Y, B) \theta - \phi^T(X, A) \theta)] . \quad (14)$$

It can be easily verified that  $\bar{g}(\theta^*) = 0$ . We then define  $\Lambda_t(\theta) = \langle \theta - \theta^*, g_t(\theta) - \bar{g}(\theta) \rangle$ .

**Lemma 2.** For any  $\theta \in \mathbb{R}^N$  such that  $\|\theta\|_2 \leq R$ ,  $\|g_t(\theta)\|_2 \leq G$ .

*Proof.* By the definition of  $g_t(\theta)$ , we obtain

$$\begin{aligned} \|g_t(\theta)\|_2 &= \|\phi(x_t, a_t)(r(x_t, a_t) + \gamma \phi^T(x_{t+1}, a_{t+1})\theta - \phi^T(x_t, a_t)\theta)\|_2 \\ &\leq |(r(x_t, a_t) + \gamma \phi^T(x_{t+1}, a_{t+1})\theta - \phi^T(x_t, a_t)\theta)| \\ &\leq r_{\max} + (1 + \gamma) \|\theta\|_2 \\ &\leq G, \end{aligned} \quad (15)$$

where the first two inequalities are due to the assumption that  $\|\phi(x, a)\|_2 \leq 1$ .  $\square$

The following lemma is useful to deal with the time-varying behavior policy.

**Lemma 3.** For any  $\theta_1$  and  $\theta_2$  in  $\mathbb{R}^N$ ,

$$d_{TV}(\mathbf{P}_{\theta_1}, \mathbf{P}_{\theta_2}) \leq |\mathcal{A}|C \left( \lceil \log_\rho m^{-1} \rceil + \frac{1}{1 - \rho} \right) \|\theta_1 - \theta_2\|_2, \quad (16)$$

and

$$d_{TV}(\mu_{\theta_1}, \mu_{\theta_2}) \leq |\mathcal{A}|C \left( 1 + \lceil \log_\rho m^{-1} \rceil + \frac{1}{1 - \rho} \right) \|\theta_1 - \theta_2\|_2. \quad (17)$$

*Proof.* For  $\theta_i, i = 1, 2$ , define the transition kernels respectively as follows:

$$K_i(x, dy) = \sum_{a \in \mathcal{A}} \mathbf{P}(dy|x, a) \pi_{\theta_i}(a|x). \quad (18)$$

Following from Theorem 3.1 in [24], we obtain

$$d_{TV}(\mathbf{P}_{\theta_1}, \mathbf{P}_{\theta_2}) \leq \left( \lceil \log_\rho m^{-1} \rceil + \frac{1}{1 - \rho} \right) \|K_1 - K_2\|, \quad (19)$$

where  $\|\cdot\|$  is the operator norm:  $\|A\| := \sup_{\|q\|_{TV}=1} \|qA\|_{TV}$ , and  $\|\cdot\|_{TV}$  denotes the total-variation norm. Then, we have

$$\begin{aligned} \|K_1 - K_2\| &= \sup_{\|q\|_{TV}=1} \left\| \int_{\mathcal{X}} q(dx) (K_1 - K_2)(x, \cdot) \right\|_{TV} \\ &= \sup_{\|q\|_{TV}=1} \int_{\mathcal{X}} \left| \int_{\mathcal{X}} q(dx) (K_1 - K_2)(x, dy) \right| \\ &\leq \sup_{\|q\|_{TV}=1} \int_{\mathcal{X}} \left| \int_{\mathcal{X}} |q(dx)| |(K_1 - K_2)(x, dy)| \right| \\ &= \sup_{\|q\|_{TV}=1} \int_{\mathcal{X}} \int_{\mathcal{X}} |q(dx)| \left| \sum_{a \in \mathcal{A}} \mathbf{P}(dy|x, a) (\pi_{\theta_1}(a|x) - \pi_{\theta_2}(a|x)) \right| \\ &\leq \sup_{\|q\|_{TV}=1} \int_{\mathcal{X}} \int_{\mathcal{X}} |q(dx)| \sum_{a \in \mathcal{A}} \mathbf{P}(dy|x, a) |\pi_{\theta_1}(a|x) - \pi_{\theta_2}(a|x)| \\ &\leq |\mathcal{A}|C \|\theta_1 - \theta_2\|_2. \end{aligned} \quad (20)$$

By definition,  $\mu_{\theta_i}(dx, a) = \mathbf{P}_{\theta_i}(dx) \pi_{\theta_i}(a|x)$ , for  $i = 1, 2$ . Therefore, the second result follows after a few steps of simple computations.  $\square$

**Lemma 4.** For any  $\theta \in \mathbb{R}^N$  such that  $\|\theta\|_2 \leq R$ ,

$$\langle \theta - \theta^*, \bar{g}(\theta) - \bar{g}(\theta^*) \rangle \leq -w_s \|\theta - \theta^*\|_2^2. \quad (21)$$

*Proof.* Let  $\tilde{\theta} = \theta - \theta^*$ . Denote by  $d\psi_\theta = \mu_\theta(dx, a)P(dy|x, a)\pi_\theta(b|y)$ . By the definition of  $\bar{g}$ , we have

$$\begin{aligned} & \langle \theta - \theta^*, \bar{g}(\theta) - \bar{g}(\theta^*) \rangle \\ &= \int_{x \in \mathcal{X}} \sum_{a \in \mathcal{A}} \tilde{\theta}^T \phi(x, a) r(x, a) (\mu_\theta(dx, a) - \mu_{\theta^*}(dx, a)) \\ & \quad + \int_{x \in \mathcal{X}} \sum_{a \in \mathcal{A}} \int_{y \in \mathcal{Y}} \sum_{b \in \mathcal{B}} \tilde{\theta}^T \phi(x, a) (\gamma \phi^T(y, b) - \phi^T(x, a)) (\theta d\psi_\theta - \theta^* d\psi_{\theta^*}) \\ &= \int_{x \in \mathcal{X}} \sum_{a \in \mathcal{A}} \tilde{\theta}^T \phi(x, a) r(x, a) (\mu_\theta(dx, a) - \mu_{\theta^*}(dx, a)) \\ & \quad + \int_{x \in \mathcal{X}} \sum_{a \in \mathcal{A}} \int_{y \in \mathcal{Y}} \sum_{b \in \mathcal{B}} \tilde{\theta}^T \phi(x, a) (\gamma \phi^T(y, b) - \phi^T(x, a)) \theta (d\psi_\theta - d\psi_{\theta^*}) \\ & \quad + \int_{x \in \mathcal{X}} \sum_{a \in \mathcal{A}} \int_{y \in \mathcal{Y}} \sum_{b \in \mathcal{B}} \tilde{\theta}^T \phi(x, a) (\gamma \phi^T(y, b) - \phi^T(x, a)) \tilde{\theta} d\psi_{\theta^*}. \end{aligned} \quad (22)$$

The first term in (22) can be bounded as follows:

$$\begin{aligned} & \int_{x \in \mathcal{X}} \sum_{a \in \mathcal{A}} \tilde{\theta}^T \phi(x, a) r(x, a) (\mu_\theta(dx, a) - \mu_{\theta^*}(dx, a)) \\ & \leq \|\tilde{\theta}\|_2 r_{\max} \|\mu_\theta - \mu_{\theta^*}\|_{TV} \\ & \leq \|\tilde{\theta}\|_2^2 r_{\max} |\mathcal{A}| C \left( 1 + \lceil \log_\rho m^{-1} \rceil + \frac{1}{1-\rho} \right) \\ & \leq \lambda_1 C \|\tilde{\theta}\|_2^2, \end{aligned} \quad (23)$$

where the second inequality follows from Lemma 3, and  $\lambda_1 = r_{\max} |\mathcal{A}| \left( 2 + \lceil \log_\rho m^{-1} \rceil + \frac{1}{1-\rho} \right)$ .

The second term in (22) can be bounded as follows:

$$\begin{aligned} & \int_{x \in \mathcal{X}} \sum_{a \in \mathcal{A}} \int_{y \in \mathcal{Y}} \sum_{b \in \mathcal{B}} \tilde{\theta}^T \phi(x, a) (\gamma \phi^T(y, b) - \phi^T(x, a)) \theta (d\psi_\theta - d\psi_{\theta^*}) \\ & \leq \|\tilde{\theta}\|_2 (1 + \gamma) \|\theta\|_2 \|\psi_\theta - \psi_{\theta^*}\|_{TV} \\ & \leq \|\tilde{\theta}\|_2^2 (1 + \gamma) R |\mathcal{A}| C \left( 2 + \lceil \log_\rho m^{-1} \rceil + \frac{1}{1-\rho} \right) \\ & = \lambda_2 C \|\tilde{\theta}\|_2^2, \end{aligned} \quad (24)$$

where the second inequality follows from Lemma 3, and  $\lambda_2 = (1 + \gamma) R |\mathcal{A}| \left( 2 + \lceil \log_\rho m^{-1} \rceil + \frac{1}{1-\rho} \right)$ .

Let  $A_{\theta^*} = \mathbb{E}_{\theta^*}[\phi(X, A)(\gamma \phi^T(Y, B) - \phi^T(X, A))]$ , which is negative definite [28, 36]. The third term in (22) is equal to  $\tilde{\theta}^T A_{\theta^*} \tilde{\theta}$ .

Hence,

$$\langle \theta - \theta^*, \bar{g}(\theta) - \bar{g}(\theta^*) \rangle \leq \tilde{\theta}^T (A_{\theta^*} + C(\lambda_1 + \lambda_2)I) \tilde{\theta} \leq -w_s \|\theta - \theta^*\|_2^2, \quad (25)$$

where  $I$  is the identity matrix, and  $-w_s$  is the largest eigenvalue of  $\frac{1}{2}((A_{\theta^*} + C(\lambda_1 + \lambda_2)I) + (A_{\theta^*} + C(\lambda_1 + \lambda_2)I)^T)$ .  $\square$

**Lemma 5.** For all  $t \geq 0$ ,  $\Lambda_t(\theta_t) \leq 2G^2$ .

*Proof.* The result follows from Lemma 2. Specifically,

$$\mathbf{\Lambda}_t(\theta) = \langle \theta - \theta^*, g_t(\theta) - \bar{g}(\theta) \rangle \leq \|\theta - \theta^*\|_2 \|g_t(\theta) - \bar{g}(\theta)\|_2 \leq 2R2G \leq 2G^2. \quad (26)$$

□

**Lemma 6.**  $|\mathbf{\Lambda}_t(\theta_1) - \mathbf{\Lambda}_t(\theta_2)| \leq (6 + \lambda C)G \|\theta_1 - \theta_2\|_2$ .

*Proof.* It is clear that

$$\begin{aligned} & |\mathbf{\Lambda}_t(\theta_1) - \mathbf{\Lambda}_t(\theta_2)| \\ &= |\langle \theta_1 - \theta^*, g_t(\theta_1) - \bar{g}(\theta_1) \rangle - \langle \theta_2 - \theta^*, g_t(\theta_2) - \bar{g}(\theta_2) \rangle| \\ &= |\langle \theta_1 - \theta^*, g_t(\theta_1) - \bar{g}(\theta_1) - (g_t(\theta_2) - \bar{g}(\theta_2)) \rangle + \langle \theta_1 - \theta^* - (\theta_2 - \theta^*), g_t(\theta_2) - \bar{g}(\theta_2) \rangle| \\ &\leq 2R \|g_t(\theta_1) - \bar{g}(\theta_1) - (g_t(\theta_2) - \bar{g}(\theta_2))\|_2 + 2G \|\theta_1 - \theta_2\|_2. \end{aligned} \quad (27)$$

The first term in (27) can be further upper bounded as follows,

$$\|g_t(\theta_1) - \bar{g}(\theta_1) - (g_t(\theta_2) - \bar{g}(\theta_2))\|_2 \leq \|g_t(\theta_1) - g_t(\theta_2)\|_2 + \|\bar{g}(\theta_1) - \bar{g}(\theta_2)\|_2. \quad (28)$$

For the first term in (28), it follows that

$$\begin{aligned} \|g_t(\theta_1) - g_t(\theta_2)\|_2 &= \|\phi(x_t, a_t) (\gamma(\phi^T(x_{t+1}, a_{t+1})\theta_1 - \phi^T(x_{t+1}, a_{t+1})\theta_2) - \phi^T(x_t, a_t)(\theta_1 - \theta_2))\|_2 \\ &\leq |\gamma\phi^T(x_{t+1}, a_{t+1})(\theta_1 - \theta_2)| + |\phi^T(x_t, a_t)(\theta_1 - \theta_2)| \\ &\leq (1 + \gamma) \|\theta_1 - \theta_2\|_2. \end{aligned} \quad (29)$$

For the second term in (28), it can be shown that

$$\begin{aligned} & \|\bar{g}(\theta_1) - \bar{g}(\theta_2)\|_2 \\ &= \left\| \int_{x \in \mathcal{X}} \sum_{a \in \mathcal{A}} \phi(x, a) r(x, a) (\mu_{\theta_1}(dx, a) - \mu_{\theta_2}(dx, a)) \right. \\ & \quad \left. + \int_{x \in \mathcal{X}} \sum_{a \in \mathcal{A}} \int_{y \in \mathcal{X}} \sum_{b \in \mathcal{A}} \phi(x, a) (\gamma\phi^T(y, b) - \phi^T(x, a)) (\theta_1 d\psi_{\theta_1} - \theta_2 d\psi_{\theta_2}) \right\|_2 \\ &= \left\| \int_{x \in \mathcal{X}} \sum_{a \in \mathcal{A}} \phi(x, a) r(x, a) (\mu_{\theta_1}(dx, a) - \mu_{\theta_2}(dx, a)) \right. \\ & \quad \left. + \int_{x \in \mathcal{X}} \sum_{a \in \mathcal{A}} \int_{y \in \mathcal{X}} \sum_{b \in \mathcal{A}} \phi(x, a) (\gamma\phi^T(y, b) - \phi^T(x, a)) \theta(d\psi_{\theta_1} - d\psi_{\theta_2}) \right. \\ & \quad \left. + \int_{x \in \mathcal{X}} \sum_{a \in \mathcal{A}} \int_{y \in \mathcal{X}} \sum_{b \in \mathcal{A}} \phi(x, a) (\gamma\phi^T(y, b) - \phi^T(x, a)) (\theta_1 - \theta_2) d\psi_{\theta_2} \right\|_2 \\ &\stackrel{(a)}{\leq} \lambda_1 C \|\theta_1 - \theta_2\|_2 + \lambda_2 C \|\theta_1 - \theta_2\|_2 + (1 + \gamma) \|\theta_1 - \theta_2\|_2 \\ &\leq (\lambda C + 1 + \gamma) \|\theta_1 - \theta_2\|_2 \end{aligned} \quad (30)$$

where (a) can be shown via similar steps to those in (23) and (24), and  $\lambda = G|\mathcal{A}|(2 + \lceil \log_\rho m^{-1} \rceil + \frac{1}{1-\rho})$ . This completes the proof. □

We next prove the major technical lemma for proving Theorem 1.

**Lemma 7.** Consider the case with diminishing step size. For any  $\tau > 0$ , and  $t > \tau$ ,

$$\mathbb{E}[\mathbf{\Lambda}_t(\theta_t)] \leq \frac{C|\mathcal{A}|G^3\tau}{w} \log \frac{t}{t-\tau} + 4G^2m\rho^{\tau-1} + \frac{(6 + \lambda C)G^2}{2w} \log \frac{t}{t-\tau}. \quad (31)$$

*Proof.* **Step 1.** For any  $i \geq 0$ , by the update rule in (1), it is clear that

$$\begin{aligned} \|\theta_{i+1} - \theta_i\|_2 &= \|\text{proj}_{2,R}(\theta_i + \alpha_i g_i(\theta_i)) - \text{proj}_{2,R}(\theta_i)\|_2 \\ &\leq \|\alpha_i g_i(\theta_i)\|_2 \\ &\leq \alpha_i G. \end{aligned} \quad (32)$$

Therefore, for any  $\tau \geq 0$ ,  $\|\theta_t - \theta_{t-\tau}\|_2 \leq \sum_{i=t-\tau}^{t-1} \|\theta_{i+1} - \theta_i\|_2 \leq G \sum_{i=t-\tau}^{t-1} \alpha_i$ , which, together with the Lipschitz continuous property of  $\Lambda_t(\theta)$  in Lemma 6, implies that  $|\Lambda_t(\theta_t) - \Lambda_t(\theta_{t-\tau})| \leq 6G^2 \sum_{i=t-\tau}^{t-1} \alpha_i$ , and thus

$$\Lambda_t(\theta_t) \leq \Lambda_t(\theta_{t-\tau}) + (6 + \lambda C)G^2 \sum_{i=t-\tau}^{t-1} \alpha_i. \quad (33)$$

**Step 2.** For convenience, rewrite  $\Lambda_t(\theta_{t-\tau}) = \Lambda_t(\theta_{t-\tau}, O_t)$ , where  $O_t = (X_t, A_t, X_{t+1}, A_{t+1})$ . Conditioning on  $\theta_{t-\tau}$  and  $X_{t-\tau+1}$ , we construct the following Markov chain:

$$X_{t-\tau+1} \rightarrow X_{t-\tau+2} \rightarrow \tilde{X}_{t-\tau+3} \rightarrow \cdots \rightarrow \tilde{X}_t \rightarrow \tilde{X}_{t+1}, \quad (34)$$

where for  $k = t - \tau + 2, \dots, t + 1$ ,

$$\mathbb{P}(\tilde{X}_k \in \cdot | \theta_{t-\tau}, \tilde{X}_{k-1}) = \sum_{a \in \mathcal{A}} \pi_{\theta_{t-\tau}}(\tilde{A}_{k-1} = a | \tilde{X}_{k-1}) \mathbb{P}(\tilde{X}_k \in \cdot | \tilde{A}_{k-1} = a, \tilde{X}_{k-1}), \quad (35)$$

where  $\tilde{X}_{t-\tau+1} = X_{t-\tau+1}$ . In short, conditioning on  $\theta_{t-\tau}$  and  $X_{t-\tau+1}$ , this new auxiliary Markov chain is generated by repeatedly applying the same behavior policy  $\pi_{\theta_{t-\tau}}$ .

From the construction of the Markov chain in (34), and the assumption that for any  $\theta$ , the Markov chain induced by repeated applying the same policy  $\pi_\theta$  is uniformly ergodic, and satisfies Assumption 1, it follows that conditioning on  $(\theta_{t-\tau}, X_{t-\tau+1})$ , for any  $k \geq t - \tau + 1$ ,

$$\|\mathbb{P}(\tilde{X}_k \in \cdot | \theta_{t-\tau}, X_{t-\tau+1}) - \mathbb{P}_{\theta_{t-\tau}}\|_{TV} \leq m\rho^{k-(t-\tau+1)}. \quad (36)$$

It can be shown that

$$\begin{aligned} & \mathbb{E}[\Lambda_t(\theta_{t-\tau}, \tilde{O}_t) | \theta_{t-\tau}, X_{t-\tau+1}] - \mathbb{E}[\Lambda_t(\theta_{t-\tau}, O'_t) | \theta_{t-\tau}, X_{t-\tau+1}] \\ & \leq 2G^2(m\rho^{\tau-1} + m\rho^\tau) \leq 4G^2m\rho^{\tau-1}. \end{aligned} \quad (37)$$

Since for any fixed  $\theta$ ,  $\mathbb{E}[\Lambda_t(\theta)] = 0$ , thus  $\mathbb{E}[\Lambda_t(\theta_{t-\tau}, O'_t) | \theta_{t-\tau}, X_{t-\tau+1}] = 0$ , where  $O'_t$  are independently generated by  $\mathbb{P}_{\theta_{t-\tau}}$  and the policy  $\pi_{\theta_{t-\tau}}$ . It then follows that

$$\mathbb{E}[\Lambda_t(\theta_{t-\tau}, \tilde{O}_t)] \leq 2G^2(m\rho^{\tau-1} + m\rho^\tau) \leq 4G^2m\rho^{\tau-1}. \quad (38)$$

**Step 3.** Conditioning on  $\theta_{t-\tau}$  and  $X_{t-\tau+1}$ , we have

$$\begin{aligned} & \mathbb{E}[\Lambda_t(\theta_{t-\tau}, O_t) | \theta_{t-\tau}, X_{t-\tau+1}] - \mathbb{E}[\Lambda_t(\theta_{t-\tau}, \tilde{O}_t) | \theta_{t-\tau}, X_{t-\tau+1}] \\ & \leq 2G^2 \|\mathbb{P}(O_t \in \cdot | \theta_{t-\tau}, X_{t-\tau+1}) - \mathbb{P}(\tilde{O}_t \in \cdot | \theta_{t-\tau}, X_{t-\tau+1})\|_{TV} \end{aligned} \quad (39)$$

In the following, we will develop an upper bound on the total-variation norm above, i.e., bounding the difference between the Markov chain induced by the original SARSA algorithm and the newly designed auxiliary Markov chain. We first show that

$$\begin{aligned} & \|\mathbb{P}(O_t \in \cdot | \theta_{t-\tau}, X_{t-\tau+1}) - \mathbb{P}(\tilde{O}_t \in \cdot | \theta_{t-\tau}, X_{t-\tau+1})\|_{TV} \\ & \leq \|\mathbb{P}(X_t \in \cdot | \theta_{t-\tau}, X_{t-\tau+1}) - \mathbb{P}(\tilde{X}_t \in \cdot | \theta_{t-\tau}, X_{t-\tau+1})\|_{TV} \\ & \quad + C|\mathcal{A}|G \sum_{i=t-\tau}^{t-1} \alpha_i + C|\mathcal{A}|G \sum_{i=t-\tau}^{t-2} \alpha_i. \end{aligned} \quad (40)$$

The proof of (40) can be found in Section B.

To bound the first term in (40), it first can be shown that

$$\begin{aligned} \mathbb{P}(X_t \in \cdot | \theta_{t-\tau}, X_{t-\tau+1}) &= \int_{\mathcal{X}} \mathbb{P}(X_{t-1} = dx, X_t \in \cdot | \theta_{t-\tau}, X_{t-\tau+1}) \\ &= \int_{\mathcal{X}} \mathbb{P}(X_{t-1} = dx | \theta_{t-\tau}, X_{t-\tau+1}) \mathbb{P}(X_t \in \cdot | \theta_{t-\tau}, X_{t-\tau+1}, X_{t-1} = x), \end{aligned} \quad (41)$$

where

$$\begin{aligned}
& \mathbb{P}(X_t \in \cdot | \theta_{t-\tau}, X_{t-\tau+1}, X_{t-1} = x) \\
&= \sum_{a \in \mathcal{A}} \mathbb{P}(X_t \in \cdot, A_{t-1} = a | \theta_{t-\tau}, X_{t-\tau+1}, X_{t-1} = x) \\
&= \sum_{a \in \mathcal{A}} \mathbb{P}(X_t \in \cdot | x, a) \mathbb{P}(A_{t-1} = a | \theta_{t-\tau}, X_{t-\tau+1}, X_{t-1} = x) \\
&= \sum_{a \in \mathcal{A}} \mathbb{P}(X_t \in \cdot | x, a) \mathbb{E}_{\theta_{t-2}} [\mathbb{P}(A_{t-1} = a | \theta_{t-2}, \theta_{t-\tau}, X_{t-\tau+1}, X_{t-1} = x) | \theta_{t-\tau}, X_{t-\tau+1}, X_{t-1} = x] \\
&= \sum_{a \in \mathcal{A}} \mathbb{P}(X_t \in \cdot | x, a) \mathbb{E}_{\theta_{t-2}} [\pi_{\theta_{t-2}}(a | x) | \theta_{t-\tau}, X_{t-\tau+1}, X_{t-1} = x]. \tag{42}
\end{aligned}$$

Similarly, it can be obtained that

$$\begin{aligned}
& \mathbb{P}(\tilde{X}_t \in \cdot | \theta_{t-\tau}, X_{t-\tau+1}) \\
&= \int_{\mathcal{X}} \mathbb{P}(\tilde{X}_{t-1} = dx, \tilde{X}_t \in \cdot | \theta_{t-\tau}, X_{t-\tau+1}) \\
&= \int_{\mathcal{X}} \mathbb{P}(\tilde{X}_{t-1} = dx | \theta_{t-\tau}, X_{t-\tau+1}) \mathbb{P}(\tilde{X}_t \in \cdot | \theta_{t-\tau}, X_{t-\tau+1}, \tilde{X}_{t-1} = x), \tag{43}
\end{aligned}$$

where

$$\begin{aligned}
& \mathbb{P}(\tilde{X}_t \in \cdot | \theta_{t-\tau}, X_{t-\tau+1}, \tilde{X}_{t-1} = x) \\
&= \sum_{a \in \mathcal{A}} \pi_{\theta_{t-\tau}}(A_{t-1} = a | \tilde{X}_{t-1} = x) \mathbb{P}(\tilde{X}_t \in \cdot | x, a). \tag{44}
\end{aligned}$$

We then bound  $\|\mathbb{P}(X_t \in \cdot | \theta_{t-\tau}, X_{t-\tau+1}) - \mathbb{P}(\tilde{X}_t \in \cdot | \theta_{t-\tau}, X_{t-\tau+1})\|_{TV}$  recursively as follows:

$$\begin{aligned}
& \|\mathbb{P}(X_t \in \cdot | \theta_{t-\tau}, X_{t-\tau+1}) - \mathbb{P}(\tilde{X}_t \in \cdot | \theta_{t-\tau}, X_{t-\tau+1})\|_{TV} \\
&= \frac{1}{2} \int_{x' \in \mathcal{X}} \left| \mathbb{P}(X_t = dx' | \theta_{t-\tau}, X_{t-\tau+1}) - \mathbb{P}(\tilde{X}_t = dx' | \theta_{t-\tau}, X_{t-\tau+1}) \right| \\
&= \frac{1}{2} \int_{x' \in \mathcal{X}} \left| \int_{x \in \mathcal{X}} \mathbb{P}(X_{t-1} = dx | \theta_{t-\tau}, X_{t-\tau+1}) \mathbb{P}(X_t = dx' | \theta_{t-\tau}, X_{t-\tau+1}, X_{t-1} = x) \right. \\
&\quad \left. - \int_{x \in \mathcal{X}} \mathbb{P}(\tilde{X}_{t-1} = dx | \theta_{t-\tau}, X_{t-\tau+1}) \mathbb{P}(\tilde{X}_t = dx' | \theta_{t-\tau}, X_{t-\tau+1}, \tilde{X}_{t-1} = x) \right| \\
&\leq \frac{1}{2} \int_{x' \in \mathcal{X}} \int_{x \in \mathcal{X}} \left| \mathbb{P}(X_{t-1} = dx | \theta_{t-\tau}, X_{t-\tau+1}) \mathbb{P}(X_t = dx' | \theta_{t-\tau}, X_{t-\tau+1}, X_{t-1} = x) \right. \\
&\quad \left. - \mathbb{P}(\tilde{X}_{t-1} = dx | \theta_{t-\tau}, X_{t-\tau+1}) \mathbb{P}(\tilde{X}_t = dx' | \theta_{t-\tau}, X_{t-\tau+1}, \tilde{X}_{t-1} = x) \right| \\
&\leq \frac{1}{2} \int_{x' \in \mathcal{X}} \int_{x \in \mathcal{X}} \left( \left| \mathbb{P}(X_{t-1} = dx | \theta_{t-\tau}, X_{t-\tau+1}) \mathbb{P}(X_t = dx' | \theta_{t-\tau}, X_{t-\tau+1}, X_{t-1} = x) \right. \right. \\
&\quad \left. \left. - \mathbb{P}(\tilde{X}_{t-1} = dx | \theta_{t-\tau}, X_{t-\tau+1}) \mathbb{P}(X_t = dx' | \theta_{t-\tau}, X_{t-\tau+1}, X_{t-1} = x) \right| \right. \\
&\quad \left. + \left| \mathbb{P}(\tilde{X}_{t-1} = dx | \theta_{t-\tau}, X_{t-\tau+1}) \mathbb{P}(X_t = dx' | \theta_{t-\tau}, X_{t-\tau+1}, X_{t-1} = x) \right. \right. \\
&\quad \left. \left. - \mathbb{P}(\tilde{X}_{t-1} = dx | \theta_{t-\tau}, X_{t-\tau+1}) \mathbb{P}(\tilde{X}_t = dx' | \theta_{t-\tau}, X_{t-\tau+1}, \tilde{X}_{t-1} = x) \right| \right) \\
&\leq \|\mathbb{P}(X_{t-1} \in \cdot | \theta_{t-\tau}, X_{t-\tau+1}) - \mathbb{P}(\tilde{X}_{t-1} \in \cdot | \theta_{t-\tau}, X_{t-\tau+1})\|_{TV} \\
&\quad + \sup_{x \in \mathcal{X}} \|\mathbb{P}(X_t \in \cdot | \theta_{t-\tau}, X_{t-\tau+1}, X_{t-1} = x) - \mathbb{P}(\tilde{X}_t \in \cdot | \theta_{t-\tau}, X_{t-\tau+1}, \tilde{X}_{t-1} = x)\|_{TV}. \tag{45}
\end{aligned}$$

The second term in (45) can be bounded using (42) and (44) as follows. For any  $x \in \mathcal{X}$ , it follows that

$$\begin{aligned}
& \|\mathbb{P}(X_t \in \cdot | \theta_{t-\tau}, X_{t-\tau+1}, X_{t-1} = x) - \mathbb{P}(\tilde{X}_t \in \cdot | \theta_{t-\tau}, X_{t-\tau+1}, \tilde{X}_{t-1} = x)\|_{TV} \\
&= \frac{1}{2} \int_{x' \in \mathcal{X}} \left| \sum_{a \in \mathcal{A}} \mathbb{P}(dx' | x, a) \mathbb{E}_{\theta_{t-2}} [\pi_{\theta_{t-2}}(a | x) | \theta_{t-\tau}, X_{t-\tau+1}, X_{t-1} = x] - \mathbb{P}(dx' | x, a) \pi_{\theta_{t-\tau}}(a | x) \right| \\
&\leq \frac{1}{2} \int_{x' \in \mathcal{X}} \sum_{a \in \mathcal{A}} \mathbb{P}(dx' | x, a) \left| \mathbb{E}_{\theta_{t-2}} [\pi_{\theta_{t-2}}(a | x) - \pi_{\theta_{t-\tau}}(a | x) | \theta_{t-\tau}, X_{t-\tau+1}, X_{t-1} = x] \right| \\
&\leq C |\mathcal{A}| G \sum_{i=t-\tau}^{t-3} \alpha_i,
\end{aligned} \tag{46}$$

where the last inequality is due to the fact that

$$\|\theta_{t-2} - \theta_{t-\tau}\|_2 \leq \sum_{i=t-\tau}^{t-3} \|\theta_{i+1} - \theta_i\|_2 \leq G \sum_{i=t-\tau}^{t-1} \alpha_i, \tag{47}$$

and  $\pi_\theta$  is Lipschitz condition in  $\theta$  as in (2).

Thus,  $\|\mathbb{P}(X_t \in \cdot | \theta_{t-\tau}, X_{t-\tau+1}) - \mathbb{P}(\tilde{X}_t \in \cdot | \theta_{t-\tau}, X_{t-\tau+1})\|_{TV}$  can be bounded recursively as follows:

$$\begin{aligned}
& \|\mathbb{P}(X_t \in \cdot | \theta_{t-\tau}, X_{t-\tau+1}) - \mathbb{P}(\tilde{X}_t \in \cdot | \theta_{t-\tau}, X_{t-\tau+1})\|_{TV} \\
&\leq \|\mathbb{P}(X_{t-1} \in \cdot | \theta_{t-\tau}, X_{t-\tau+1}) - \mathbb{P}(\tilde{X}_{t-1} \in \cdot | \theta_{t-\tau}, X_{t-\tau+1})\|_{TV} + C |\mathcal{A}| G \sum_{i=t-\tau}^{t-3} \alpha_i.
\end{aligned} \tag{48}$$

Doing this recursively implies that

$$\begin{aligned}
& \|\mathbb{P}(O_t \in \cdot | \theta_{t-\tau}, X_{t-\tau+1}) - \mathbb{P}(\tilde{O}_t \in \cdot | \theta_{t-\tau}, X_{t-\tau+1})\|_{TV} \\
&\leq \|\mathbb{P}(X_{t-\tau+2} \in \cdot | \theta_{t-\tau}, X_{t-\tau+1}) - \mathbb{P}(\tilde{X}_{t-\tau+2} \in \cdot | \theta_{t-\tau}, X_{t-\tau+1})\|_{TV} + C |\mathcal{A}| G \sum_{j=t-\tau}^{t-1} \sum_{i=t-\tau}^j \alpha_i \\
&= C |\mathcal{A}| G \sum_{j=t-\tau}^{t-1} \sum_{i=t-\tau}^j \alpha_i \\
&\leq \frac{C |\mathcal{A}| G \tau}{2w} \log \frac{t}{t-\tau}.
\end{aligned} \tag{49}$$

Combining Steps 1, 2 and 3 completes the proof.  $\square$

## B Proof of Equation (40)

The total variation in (39) can be written as follows:

$$\begin{aligned}
& \|\mathbb{P}(O_t \in \cdot | \theta_{t-\tau}, X_{t-\tau+1}) - \mathbb{P}(\tilde{O}_t \in \cdot | \theta_{t-\tau}, X_{t-\tau+1})\|_{TV} \\
&= \frac{1}{2} \int_{\mathcal{X}} \sum_{\mathcal{A}} \int_{\mathcal{X}} \sum_{\mathcal{A}} \left| \mathbb{P}(X_t = dx, A_t = a, X_{t+1} = dx', A_{t+1} = a' | \theta_{t-\tau}, X_{t-\tau+1}) \right. \\
&\quad \left. - \mathbb{P}(\tilde{X}_t = dx, \tilde{A}_t = a, \tilde{X}_{t+1} = dx', \tilde{A}_{t+1} = a' | \theta_{t-\tau}, X_{t-\tau+1}) \right|.
\end{aligned} \tag{50}$$

Here, the first term in (50) can be written as

$$\begin{aligned}
& \mathbb{P}(X_t = dx, A_t = a, X_{t+1} = dx', A_{t+1} = a' | \theta_{t-\tau}, X_{t-\tau+1}) \\
&= \int_{\substack{z_{t-1} \in \mathbb{R}^N \\ z_t \in \mathbb{R}^N}} \mathbb{P}(X_t = dx, A_t = a, X_{t+1} = dx', A_{t+1} = a', \theta_{t-1} = dz_{t-1}, \theta_t = dz_t | \theta_{t-\tau}, X_{t-\tau+1}) \\
&= \int_{\mathbb{R}^N} \int_{\mathbb{R}^N} \mathbb{P}(X_t = dx | \theta_{t-\tau}, X_{t-\tau+1}) \mathbb{P}(\theta_{t-1} = dz_{t-1} | \theta_{t-\tau}, X_{t-\tau+1}, X_t = x) \\
&\quad \times \pi_{z_{t-1}}(a|x) \mathbb{P}(\theta_t = dz_t | \theta_{t-\tau}, X_{t-\tau+1}, X_t = x, A_t = a, \theta_{t-1} = z_{t-1}) \mathbb{P}(dx' | x, a) \pi_{z_t}(a' | x').
\end{aligned} \tag{51}$$

By the definition of the newly designed auxiliary Markov chain, the second term in (50) can be written as

$$\begin{aligned}
& \mathbb{P}(\tilde{X}_t = dx, \tilde{A}_t = a, \tilde{X}_{t+1} = dx', \tilde{A}_{t+1} = a' | \theta_{t-\tau}, X_{t-\tau+1}) \\
&= \mathbb{P}(\tilde{X}_t = dx | \theta_{t-\tau}, X_{t-\tau+1}) \pi_{\theta_{t-\tau}}(a|x) \mathbb{P}(dx' | x, a) \pi_{\theta_{t-\tau}}(a' | x') \\
&= \int_{\substack{z_{t-1} \in \mathbb{R}^N \\ z_t \in \mathbb{R}^N}} \mathbb{P}(\tilde{X}_t = dx | \theta_{t-\tau}, X_{t-\tau+1}) \pi_{\theta_{t-\tau}}(a|x) \mathbb{P}(dx' | x, a) \pi_{\theta_{t-\tau}}(a' | x') \\
&\quad \times \mathbb{P}(\theta_{t-1} = dz_{t-1} | \theta_{t-\tau}, X_{t-\tau+1}, X_t = x) \mathbb{P}(\theta_t = dz_t | \theta_{t-\tau}, X_{t-\tau+1}, X_t = x, A_t = a, \theta_{t-1} = z_{t-1})
\end{aligned} \tag{52}$$

Thus, by plugging (51) and (52) into (50), (50) can be further bounded as follows:

$$\begin{aligned}
& \|\mathbb{P}(O_t \in \cdot | \theta_{t-\tau}, X_{t-\tau+1}) - \mathbb{P}(\tilde{O}_t \in \cdot | \theta_{t-\tau}, X_{t-\tau+1})\|_{TV} \\
&= \frac{1}{2} \int_{\mathcal{X}} \sum_{\mathcal{A}} \int_{\mathcal{X}} \sum_{\mathcal{A}} \left| \int_{\mathbb{R}^N} \int_{\mathbb{R}^N} \left( \mathbb{P}(X_t = dx | \theta_{t-\tau}, X_{t-\tau+1}) \mathbb{P}(\theta_{t-1} = dz_{t-1} | \theta_{t-\tau}, X_{t-\tau+1}, X_t = x) \right. \right. \\
&\quad \times \pi_{z_{t-1}}(a|x) \mathbb{P}(\theta_t = dz_t | \theta_{t-\tau}, X_{t-\tau+1}, X_t = x, A_t = a, \theta_{t-1} = z_{t-1}) \mathbb{P}(dx' | x, a) \pi_{z_t}(a' | x') \\
&\quad - \mathbb{P}(\tilde{X}_t = dx | \theta_{t-\tau}, X_{t-\tau+1}) \pi_{\theta_{t-\tau}}(a|x) \mathbb{P}(dx' | x, a) \pi_{\theta_{t-\tau}}(a' | x') \\
&\quad \times \mathbb{P}(\theta_{t-1} = dz_{t-1} | \theta_{t-\tau}, X_{t-\tau+1}, X_t = x) \mathbb{P}(\theta_t = dz_t | \theta_{t-\tau}, X_{t-\tau+1}, X_t = x, A_t = a, \theta_{t-1} = z_{t-1}) \Big) \Big| \\
&\leq \frac{1}{2} \int_{\mathcal{X}} \sum_{\mathcal{A}} \int_{\mathcal{X}} \sum_{\mathcal{A}} \int_{\mathbb{R}^N} \int_{\mathbb{R}^N} \left| \left( \mathbb{P}(X_t = dx | \theta_{t-\tau}, X_{t-\tau+1}) \mathbb{P}(\theta_{t-1} = dz_{t-1} | \theta_{t-\tau}, X_{t-\tau+1}, X_t = x) \right. \right. \\
&\quad \times \pi_{z_{t-1}}(a|x) \mathbb{P}(\theta_t = dz_t | \theta_{t-\tau}, X_{t-\tau+1}, X_t = x, A_t = a, \theta_{t-1} = z_{t-1}) \mathbb{P}(dx' | x, a) \pi_{z_t}(a' | x') \\
&\quad - \mathbb{P}(\tilde{X}_t = dx | \theta_{t-\tau}, X_{t-\tau+1}) \pi_{\theta_{t-\tau}}(a|x) \mathbb{P}(dx' | x, a) \pi_{\theta_{t-\tau}}(a' | x') \\
&\quad \times \mathbb{P}(\theta_{t-1} = dz_{t-1} | \theta_{t-\tau}, X_{t-\tau+1}, X_t = x) \mathbb{P}(\theta_t = dz_t | \theta_{t-\tau}, X_{t-\tau+1}, X_t = x, A_t = a, \theta_{t-1} = z_{t-1}) \Big) \Big|.
\end{aligned} \tag{53}$$

With a slight abuse of notations, let

$$\begin{aligned}
M_1 &= \mathbb{P}(X_t = dx | \theta_{t-\tau}, X_{t-\tau+1}) \mathbb{P}(\theta_{t-1} = dz_{t-1} | \theta_{t-\tau}, X_{t-\tau+1}, X_t = x) \\
&\quad \times \pi_{z_{t-1}}(a|x) \mathbb{P}(\theta_t = dz_t | \theta_{t-\tau}, X_{t-\tau+1}, X_t = x, A_t = a, \theta_{t-1} = z_{t-1}) \mathbb{P}(dx' | x, a) \pi_{z_t}(a' | x'), \\
M_2 &= \mathbb{P}(\tilde{X}_t = dx | \theta_{t-\tau}, X_{t-\tau+1}) \mathbb{P}(\theta_{t-1} = dz_{t-1} | \theta_{t-\tau}, X_{t-\tau+1}, X_t = x) \\
&\quad \times \mathbb{P}(\theta_t = dz_t | \theta_{t-\tau}, X_{t-\tau+1}, X_t = x, A_t = a, \theta_{t-1} = z_{t-1}) \pi_{\theta_{t-\tau}}(a|x) \mathbb{P}(dx' | x, a) \pi_{\theta_{t-\tau}}(a' | x').
\end{aligned} \tag{54}$$

Thus, (53) can be written as

$$\begin{aligned}
& \|\mathbb{P}(O_t \in \cdot | \theta_{t-\tau}, X_{t-\tau+1}) - \mathbb{P}(\tilde{O}_t \in \cdot | \theta_{t-\tau}, X_{t-\tau+1})\|_{TV} \\
&\leq \frac{1}{2} \int_{\mathcal{X}} \sum_{\mathcal{A}} \int_{\mathcal{X}} \sum_{\mathcal{A}} \int_{\mathbb{R}^N} \int_{\mathbb{R}^N} |M_1 - M_2|,
\end{aligned} \tag{55}$$

This can be further bounded as follows

$$\begin{aligned}
& \|\mathbb{P}(O_t \in \cdot | \theta_{t-\tau}, X_{t-\tau+1}) - \mathbb{P}(\tilde{O}_t \in \cdot | \theta_{t-\tau}, X_{t-\tau+1})\|_{TV} \\
& \leq \frac{1}{2} \int_{\mathcal{X}} \sum_{\mathcal{A}} \int_{\mathcal{X}} \sum_{\mathcal{A}} \int_{\mathbb{R}^N} \int_{\mathbb{R}^N} |M_1 - M_3 + M_3 - M_2| \\
& \leq \frac{1}{2} \int_{\mathcal{X}} \sum_{\mathcal{A}} \int_{\mathcal{X}} \sum_{\mathcal{A}} \int_{\mathbb{R}^N} \int_{\mathbb{R}^N} |M_1 - M_3| + |M_3 - M_2|, \tag{56}
\end{aligned}$$

where

$$\begin{aligned}
M_3 &= \mathbb{P}(\tilde{X}_t = dx | \theta_{t-\tau}, X_{t-\tau+1}) \mathbb{P}(\theta_t = dz_t | \theta_{t-\tau}, X_{t-\tau+1}, X_t = x, A_t = a, \theta_{t-1} = z_{t-1}) \\
& \times \mathbb{P}(\theta_{t-1} = dz_{t-1} | \theta_{t-\tau}, X_{t-\tau+1}, X_t = x) \pi_{\theta_{t-\tau}}(a|x) \mathbb{P}(dx' | x, a) \pi_{z_t}(a' | x'). \tag{57}
\end{aligned}$$

We first consider the second term in (56):

$$\begin{aligned}
& \frac{1}{2} \int_{\mathcal{X}} \sum_{\mathcal{A}} \int_{\mathcal{X}} \sum_{\mathcal{A}} \int_{\mathbb{R}^N} \int_{\mathbb{R}^N} |M_3 - M_2| \\
&= \frac{1}{2} \int_{\mathcal{X}} \sum_{\mathcal{A}} \int_{\mathcal{X}} \sum_{\mathcal{A}} \int_{\mathbb{R}^N} \int_{\mathbb{R}^N} \left| \mathbb{P}(\tilde{X}_t = dx | \theta_{t-\tau}, X_{t-\tau+1}) \pi_{\theta_{t-\tau}}(a|x) \mathbb{P}(dx' | x, a) \pi_{z_t}(a' | x') \right. \\
& \quad \times \mathbb{P}(\theta_{t-1} = dz_{t-1} | \theta_{t-\tau}, X_{t-\tau+1}, X_t = x) \mathbb{P}(\theta_t = dz_t | \theta_{t-\tau}, X_{t-\tau+1}, X_t = x, A_t = a, \theta_{t-1} = z_{t-1}) \\
& \quad - \mathbb{P}(\tilde{X}_t = dx | \theta_{t-\tau}, X_{t-\tau+1}) \pi_{\theta_{t-\tau}}(a|x) \mathbb{P}(dx' | x, a) \pi_{\theta_{t-\tau}}(a' | x') \\
& \quad \left. \times \mathbb{P}(\theta_{t-1} = dz_{t-1} | \theta_{t-\tau}, X_{t-\tau+1}, X_t = x) \mathbb{P}(\theta_t = dz_t | \theta_{t-\tau}, X_{t-\tau+1}, X_t = x, A_t = a, \theta_{t-1} = z_{t-1}) \right| \\
&= \frac{1}{2} \int_{\mathcal{X}} \sum_{\mathcal{A}} \int_{\mathcal{X}} \sum_{\mathcal{A}} \int_{\mathbb{R}^N} \int_{\mathbb{R}^N} \mathbb{P}(\tilde{X}_t = dx | \theta_{t-\tau}, X_{t-\tau+1}) \pi_{\theta_{t-\tau}}(a|x) \mathbb{P}(dx' | x, a) \\
& \quad \times \mathbb{P}(\theta_{t-1} = dz_{t-1} | \theta_{t-\tau}, X_{t-\tau+1}, X_t = x) \mathbb{P}(\theta_t = dz_t | \theta_{t-\tau}, X_{t-\tau+1}, X_t = x, A_t = a, \theta_{t-1} = z_{t-1}) \\
& \quad \times \left| \pi_{z_t}(a' | x') - \pi_{\theta_{t-\tau}}(a' | x') \right| \\
&= \int_{\mathcal{X}} \sum_{\mathcal{A}} \int_{\mathcal{X}} \int_{\mathbb{R}^N} \int_{\mathbb{R}^N} \mathbb{P}(\tilde{X}_t = dx | \theta_{t-\tau}, X_{t-\tau+1}) \pi_{\theta_{t-\tau}}(a|x) \mathbb{P}(dx' | x, a) \\
& \quad \times \mathbb{P}(\theta_{t-1} = dz_{t-1} | \theta_{t-\tau}, X_{t-\tau+1}, X_t = x) \mathbb{P}(\theta_t = dz_t | \theta_{t-\tau}, X_{t-\tau+1}, X_t = x, A_t = a, \theta_{t-1} = z_{t-1}) \\
& \quad \times \|\pi_{z_t}(\cdot | x') - \pi_{\theta_{t-\tau}}(\cdot | x')\|_{TV} \\
&\leq \int_{\mathcal{X}} \sum_{\mathcal{A}} \int_{\mathcal{X}} \int_{\mathbb{R}^N} \int_{\mathbb{R}^N} \mathbb{P}(\tilde{X}_t = dx | \theta_{t-\tau}, X_{t-\tau+1}) \pi_{\theta_{t-\tau}}(a|x) \mathbb{P}(dx' | x, a) \\
& \quad \times \mathbb{P}(\theta_{t-1} = dz_{t-1} | \theta_{t-\tau}, X_{t-\tau+1}, X_t = x) \mathbb{P}(\theta_t = dz_t | \theta_{t-\tau}, X_{t-\tau+1}, X_t = x, A_t = a, \theta_{t-1} = z_{t-1}) \\
& \quad \times \sup_{x' \in \mathcal{X}} \|\pi_{z_t}(\cdot | x') - \pi_{\theta_{t-\tau}}(\cdot | x')\|_{TV} \tag{58}
\end{aligned}$$

Recalling that

$$\|\theta_t - \theta_{t-\tau}\|_2 \leq \sum_{i=t-\tau}^{t-1} \|\theta_{i+1} - \theta_i\|_2 \leq G \sum_{i=t-\tau}^{t-1} \alpha_i, \tag{59}$$

and by the Lipschitz condition in (2), it follows that for any  $x' \in \mathcal{X}$ ,

$$\|\pi_{\theta_t}(\cdot | x') - \pi_{\theta_{t-\tau}}(\cdot | x')\|_{TV} \leq C|\mathcal{A}|G \sum_{i=t-\tau}^{t-1} \alpha_i. \tag{60}$$

Thus, for any  $z_t$  such that  $z_t dz_t$  has non-zero measure, i.e.,  $\theta_{t-1} = z_{t-1}$  satisfies (59), it can be shown that

$$\sup_{x' \in \mathcal{X}} \|\pi_{z_t}(\cdot | x') - \pi_{\theta_{t-\tau}}(\cdot | x')\|_{TV} \leq C|\mathcal{A}|G \sum_{i=t-\tau}^{t-1} \alpha_i, \tag{61}$$



which further implies that (58) can be further bounded by  $C|\mathcal{A}|G \sum_{i=t-\tau}^{t-1} \alpha_i$ .

We then consider the first term in (56):

$$\begin{aligned}
& \frac{1}{2} \int_{\mathcal{X}} \sum_{\mathcal{A}} \int_{\mathcal{X}} \sum_{\mathcal{A}} \int_{\mathbb{R}^N} \int_{\mathbb{R}^N} |M_1 - M_3| \\
&= \frac{1}{2} \int_{\mathcal{X}} \sum_{\mathcal{A}} \int_{\mathcal{X}} \sum_{\mathcal{A}} \int_{\mathbb{R}^N} \int_{\mathbb{R}^N} \left| \mathbb{P}(X_t = dx | \theta_{t-\tau}, X_{t-\tau+1}) \mathbb{P}(\theta_{t-1} = dz_{t-1} | \theta_{t-\tau}, X_{t-\tau+1}, X_t = x) \right. \\
&\quad \times \pi_{z_{t-1}}(a|x) \mathbb{P}(\theta_t = dz_t | \theta_{t-\tau}, X_{t-\tau+1}, X_t = x, A_t = a, \theta_{t-1} = z_{t-1}) \mathbb{P}(dx' | x, a) \pi_{z_t}(a'|x') \\
&\quad - \mathbb{P}(\tilde{X}_t = dx | \theta_{t-\tau}, X_{t-\tau+1}) \mathbb{P}(\theta_{t-1} = dz_{t-1} | \theta_{t-\tau}, X_{t-\tau+1}, X_t = x) \\
&\quad \times \pi_{\theta_{t-\tau}}(a|x) \mathbb{P}(dx' | x, a) \pi_{z_t}(a'|x') \mathbb{P}(\theta_t = dz_t | \theta_{t-\tau}, X_{t-\tau+1}, X_t = x, A_t = a, \theta_{t-1} = z_{t-1}) \left. \right| \\
&= \frac{1}{2} \int_{\mathcal{X}} \sum_{\mathcal{A}} \int_{\mathcal{X}} \sum_{\mathcal{A}} \int_{\mathbb{R}^N} \int_{\mathbb{R}^N} \pi_{z_t}(a'|x') \mathbb{P}(dx' | x, a) \mathbb{P}(\theta_{t-1} = dz_{t-1} | \theta_{t-\tau}, X_{t-\tau+1}, X_t = x) \\
&\quad \times \mathbb{P}(\theta_t = dz_t | \theta_{t-\tau}, X_{t-\tau+1}, X_t = x, A_t = a, \theta_{t-1} = z_{t-1}) \\
&\quad \times \left| \mathbb{P}(X_t = dx | \theta_{t-\tau}, X_{t-\tau+1}) \pi_{z_{t-1}}(a|x) - \mathbb{P}(\tilde{X}_t = dx | \theta_{t-\tau}, X_{t-\tau+1}) \pi_{\theta_{t-\tau}}(a|x) \right| \\
&= \frac{1}{2} \int_{\mathcal{X}} \sum_{\mathcal{A}} \int_{\mathbb{R}^N} \mathbb{P}(\theta_{t-1} = dz_{t-1} | \theta_{t-\tau}, X_{t-\tau+1}, X_t = x) \left| \mathbb{P}(X_t = dx | \theta_{t-\tau}, X_{t-\tau+1}) \pi_{z_{t-1}}(a|x) \right. \\
&\quad \left. - \mathbb{P}(\tilde{X}_t = dx | \theta_{t-\tau}, X_{t-\tau+1}) \pi_{\theta_{t-\tau}}(a|x) \right| \tag{62}
\end{aligned}$$

To further bound (62), we play a similar trick as the one in (56). It follows that

$$\begin{aligned}
& \frac{1}{2} \int_{\mathcal{X}} \sum_{\mathcal{A}} \int_{\mathbb{R}^N} \mathbb{P}(\theta_{t-1} = dz_{t-1} | \theta_{t-\tau}, X_{t-\tau+1}, X_t = x) \left| \mathbb{P}(X_t = dx | \theta_{t-\tau}, X_{t-\tau+1}) \pi_{z_{t-1}}(a|x) \right. \\
&\quad \left. - \mathbb{P}(\tilde{X}_t = dx | \theta_{t-\tau}, X_{t-\tau+1}) \pi_{\theta_{t-\tau}}(a|x) \right| \\
&\leq \frac{1}{2} \int_{\mathcal{X}} \sum_{\mathcal{A}} \int_{\mathbb{R}^N} \mathbb{P}(\theta_{t-1} = dz_{t-1} | \theta_{t-\tau}, X_{t-\tau+1}, X_t = x) \left( \left| \mathbb{P}(X_t = dx | \theta_{t-\tau}, X_{t-\tau+1}) \pi_{z_{t-1}}(a|x) \right. \right. \\
&\quad \left. \left. - \mathbb{P}(\tilde{X}_t = dx | \theta_{t-\tau}, X_{t-\tau+1}) \pi_{z_{t-1}}(a|x) \right| \right. \\
&\quad \left. + \left| \mathbb{P}(\tilde{X}_t = dx | \theta_{t-\tau}, X_{t-\tau+1}) \pi_{z_{t-1}}(a|x) - \mathbb{P}(\tilde{X}_t = dx | \theta_{t-\tau}, X_{t-\tau+1}) \pi_{\theta_{t-\tau}}(a|x) \right| \right) \\
&= \frac{1}{2} \int_{\mathcal{X}} \left| \mathbb{P}(X_t = dx | \theta_{t-\tau}, X_{t-\tau+1}) - \mathbb{P}(\tilde{X}_t = dx | \theta_{t-\tau}, X_{t-\tau+1}) \right| \\
&\quad + \frac{1}{2} \int_{\mathcal{X}} \sum_{\mathcal{A}} \int_{\mathbb{R}^N} \mathbb{P}(\theta_{t-1} = dz_{t-1} | \theta_{t-\tau}, X_{t-\tau+1}, X_t = x) \mathbb{P}(\tilde{X}_t = dx | \theta_{t-\tau}, X_{t-\tau+1}) \\
&\quad \times \left| \pi_{z_{t-1}}(a|x) - \pi_{\theta_{t-\tau}}(a|x) \right| \\
&\leq \frac{1}{2} \int_{\mathcal{X}} \left| \mathbb{P}(X_t = dx | \theta_{t-\tau}, X_{t-\tau+1}) - \mathbb{P}(\tilde{X}_t = dx | \theta_{t-\tau}, X_{t-\tau+1}) \right| \\
&\quad + \int_{\mathcal{X}} \int_{\mathbb{R}^N} \mathbb{P}(\theta_{t-1} = dz_{t-1} | \theta_{t-\tau}, X_{t-\tau+1}, X_t = x) \mathbb{P}(\tilde{X}_t = dx | \theta_{t-\tau}, X_{t-\tau+1}) \\
&\quad \times \sup_{x \in \mathcal{X}} \|\pi_{z_{t-1}}(\cdot|x) - \pi_{\theta_{t-\tau}}(\cdot|x)\|_{TV} \tag{63}
\end{aligned}$$

The first term in (63) is

$$\|\mathbb{P}(X_t \in \cdot | \theta_{t-\tau}, X_{t-\tau+1}) - \mathbb{P}(\tilde{X}_t \in \cdot | \theta_{t-\tau}, X_{t-\tau+1})\|_{TV}. \tag{64}$$

The second term can be bounded similar to (58). More specifically, recalling that

$$\|\theta_t - \theta_{t-\tau}\|_2 \leq \sum_{i=t-\tau}^{t-1} \|\theta_{i+1} - \theta_i\|_2 \leq G \sum_{i=t-\tau}^{t-1} \alpha_i, \quad (65)$$

and by the Lipschitz condition in (2), it follows that for any  $x \in \mathcal{X}$  and any  $z_{t-1}$  such that  $z_{t-1} dz_{t-1}$  has non-zero measure, then

$$\|\pi_{z_{t-1}}(\cdot|x) - \pi_{\theta_{t-\tau}}(\cdot|x)\|_{TV} \leq C|\mathcal{A}| \|\theta_{t-1} - \theta_{t-\tau}\|_2 \leq C|\mathcal{A}|G \sum_{i=t-\tau}^{t-2} \alpha_i. \quad (66)$$

Thus, (63) is upper bounded by

$$\|\mathbb{P}(X_t \in \cdot | \theta_{t-\tau}, X_{t-\tau+1}) - \mathbb{P}(\tilde{X}_t \in \cdot | \theta_{t-\tau}, X_{t-\tau+1})\|_{TV} + C|\mathcal{A}|G \sum_{i=t-\tau}^{t-2} \alpha_i \quad (67)$$

## C Proof of Theorem 1

We decompose the error as follows,

$$\begin{aligned} & \mathbb{E}[\|\theta_{t+1} - \theta^*\|_2^2] \\ &= \mathbb{E}[\|\text{proj}_{2,R}(\theta_t + \alpha_t g_t(\theta_t)) - \text{proj}_{2,R}(\theta^*)\|_2^2] \\ &\leq \mathbb{E}[\|\theta_t + \alpha_t g_t(\theta_t) - \theta^*\|_2^2] \\ &= \mathbb{E}[\|\theta_t - \theta^*\|_2^2 + \alpha_t^2 \|g_t(\theta_t)\|_2^2 + 2\alpha_t \langle \theta_t - \theta^*, g_t(\theta_t) \rangle] \\ &= \mathbb{E}[\|\theta_t - \theta^*\|_2^2 + \alpha_t^2 \|g_t(\theta_t)\|_2^2 + 2\alpha_t \langle \theta_t - \theta^*, \bar{g}(\theta_t) - \bar{g}(\theta^*) \rangle + 2\alpha_t \mathbf{\Lambda}_t(\theta_t)], \end{aligned} \quad (68)$$

where the inequality is due to the fact that orthogonal projections onto a convex set are non-expansive, and the last step is due to the fact that  $\bar{g}(\theta^*) = 0$ . Applying Lemmas 2 and 4 implies that

$$\mathbb{E}[\|\theta_{t+1} - \theta^*\|_2^2] \leq \mathbb{E}[(1 - 2\alpha_t w_s) \|\theta_t - \theta^*\|_2^2 + \alpha_t^2 G^2 + 2\alpha_t \mathbf{\Lambda}_t(\theta_t)], \quad (69)$$

which further implies that

$$w(t+1)\mathbb{E}[\|\theta_{t+1} - \theta^*\|_2^2] \leq \mathbb{E}[tw \|\theta_t - \theta^*\|_2^2 + \frac{1}{2}\alpha_t G^2 + \mathbf{\Lambda}_t(\theta_t)]. \quad (70)$$

Applying (70) recursively and Lemma 7 (with  $\tau = \tau_0$ ) yields that

$$\begin{aligned} & wT\mathbb{E}[\|\theta_T - \theta^*\|_2^2] \\ &\leq \sum_{t=0}^{T-1} \left( \frac{1}{2}\alpha_t G^2 + \mathbb{E}[\mathbf{\Lambda}_t(\theta_t)] \right) \\ &\leq \frac{(\log T + 1)G^2}{4w} + \sum_{t=0}^{\tau_0} \mathbb{E}[\mathbf{\Lambda}_t(\theta_t)] + \sum_{t=\tau_0+1}^{T-1} \mathbb{E}[\mathbf{\Lambda}_t(\theta_t)] \\ &\leq \frac{(\log T + 1)G^2}{4w} + 2G^2(\tau_0 + 1) + \frac{(C|\mathcal{A}|G^3\tau_0^2 + (6 + \lambda C)G^2\tau_0/2)(\log T + 1)}{w} + \frac{2G^2}{\rho w} \\ &= \frac{G^2(4C|\mathcal{A}|G\tau_0^2 + (12 + 2\lambda C)\tau_0 + 1)(\log T + 1)}{4w} + \frac{2G^2(\tau_0 w + w + \rho^{-1})}{w}, \end{aligned} \quad (71)$$

which completes the proof.

## D Proof of Lemma 1

Consider  $A_\theta = \mathbb{E}_\theta[\phi(X, A)(\gamma\phi^T(Y, B)\theta - \phi^T(X, A)\theta)]$ , and  $b_\theta = \mathbb{E}_\theta[\phi(X, A)r(X, A)]$  as defined in Section 3.2 with respect to  $\theta$ . It has been shown that for any  $\theta \in \mathbb{R}^N$ ,  $A_\theta$  is negative definite [28, 36]. Denote by  $w_l$  the largest eigenvalue of  $\frac{1}{2}(A_{\theta^*} + A_{\theta^*}^T)$ . Recall that the limit point  $\theta^*$  satisfies the following relationship  $-A_{\theta^*}\theta^* = b_{\theta^*}$  (Theorem 2 [23]). It then follows that  $-(\theta^*)^T A_{\theta^*} \theta^* = (\theta^*)^T b_{\theta^*}$ , which implies  $-w_l \|\theta^*\|_2^2 \leq \|\theta^*\|_2 r_{\max}$ . Thus,  $\|\theta^*\|_2 \leq -\frac{r_{\max}}{w_l}$ , which completes the proof.

## E Proof of Theorem 2

The proof for Theorem 2 with constant step size is similar to the proof of Theorem 1. In the following, we mainly outline the difference between them.

First, we obtain the following results from Lemma 7 by letting  $\tau = t$  if  $t \leq \tau_0$ , and  $\tau = \tau_0$  if  $t > \tau_0$ :

$$\mathbb{E}[\mathbf{\Lambda}_t(\theta_t)] \leq (6 + \lambda C)G^2\tau_0\alpha_0 + 4G^2\alpha_0/\rho + 2G^3C|\mathcal{A}|\tau_0^2\alpha_0, \quad (72)$$

where  $\tau_0 = \inf\{t \geq 0 : m\rho^t \leq \alpha_0\}$ .

We then decompose the error following similar steps to those in (68), and we obtain that

$$\begin{aligned} & \mathbb{E}[\|\theta_{t+1} - \theta^*\|_2^2] \\ & \leq \mathbb{E}[\|\theta_t - \theta^*\|_2^2 + \alpha_0^2 \|g_t(\theta_t)\|_2^2 + 2\alpha_t \langle \theta_t - \theta^*, \bar{g}(\theta_t) - \bar{g}(\theta^*) \rangle + 2\alpha_0 \mathbf{\Lambda}_t(\theta_t)] \\ & \leq \mathbb{E}[\|\theta_t - \theta^*\|_2^2 + \alpha_0^2 G^2 - 2\alpha_0 w_s \|\theta_t - \theta^*\|_2^2 + 2\alpha_0 \mathbf{\Lambda}_t(\theta_t)] \\ & = \mathbb{E}[(1 - 2\alpha_0 w_s) \|\theta_t - \theta^*\|_2^2 + \alpha_0^2 G^2 + 2\alpha_0 \mathbf{\Lambda}_t(\theta_t)] \end{aligned} \quad (73)$$

where the last inequality follows from Lemma 4. Applying (73) recursively with (72), we obtain Theorem 2.

## F Proof of Theorem 3

Before we start the proof of Theorem 3, we first present the following lemma.

**Lemma 8.** Consider a non-increasing step-size sequence  $\alpha_0 \geq \alpha_1 \dots \geq \alpha_T$ . For any fixed  $\tau$ , and  $tB \leq i \leq (t+1)B - 1$ , if  $tB \leq \tau$ , then we have that

$$\mathbb{E}[\langle \theta_{tB} - \theta^*, g_i(\theta_i) - \bar{g}(\theta_{tB}) \rangle] \leq 2G^2; \quad (74)$$

and if  $tB > \tau$ , then

$$\begin{aligned} & \mathbb{E}[\langle \theta_{tB} - \theta^*, g_i(\theta_i) - \bar{g}(\theta_{tB}) \rangle] \\ & \leq (6 + \lambda C)G^2(\tau + B)\alpha_{tB-\tau} + 4G^2m\rho^{\tau-1} + C|\mathcal{A}|G^3\tau^2\alpha_{tB-\tau}. \end{aligned} \quad (75)$$

*Proof.* For any fixed  $\tau$ , if  $tB \leq \tau$ , then we use the following upper bound:

$$\mathbb{E}[\langle \theta_{tB} - \theta^*, g_i(\theta_i) - \bar{g}(\theta_{tB}) \rangle] \leq 4RG \leq 2G^2, \quad (76)$$

and if  $tB > \tau$ , then for any  $tB \leq i \leq (t+1)B - 1$ , it follows that

$$\begin{aligned} & \mathbb{E}[\langle \theta_{tB} - \theta^*, g_i(\theta_i) - \bar{g}(\theta_{tB}) \rangle] \\ & = \mathbb{E}[\langle \theta_{tB-\tau} - \theta^*, g_i(\theta_{tB-\tau}) - \bar{g}(\theta_{tB-\tau}) \rangle] \\ & \quad + \mathbb{E}[\langle \theta_{tB} - \theta^*, g_i(\theta_i) - \bar{g}(\theta_{tB}) \rangle] - \mathbb{E}[\langle \theta_{tB-\tau} - \theta^*, g_i(\theta_{tB-\tau}) - \bar{g}(\theta_{tB-\tau}) \rangle]. \end{aligned} \quad (77)$$

The difference between the second and third terms in (77) can be bounded as follows:

$$\begin{aligned} & \mathbb{E}[\langle \theta_{tB} - \theta^*, g_i(\theta_i) - \bar{g}(\theta_{tB}) \rangle] - \mathbb{E}[\langle \theta_{tB-\tau} - \theta^*, g_i(\theta_{tB-\tau}) - \bar{g}(\theta_{tB-\tau}) \rangle] \\ & = \mathbb{E}[\langle \theta_{tB} - \theta^*, g_i(\theta_i) - \bar{g}(\theta_{tB}) \rangle] - \mathbb{E}[\langle \theta_{tB} - \theta^*, g_i(\theta_{tB-\tau}) - \bar{g}(\theta_{tB-\tau}) \rangle] \\ & \quad + \mathbb{E}[\langle \theta_{tB} - \theta^*, g_i(\theta_{tB-\tau}) - \bar{g}(\theta_{tB-\tau}) \rangle] - \mathbb{E}[\langle \theta_{tB-\tau} - \theta^*, g_i(\theta_{tB-\tau}) - \bar{g}(\theta_{tB-\tau}) \rangle] \\ & = \mathbb{E}[\langle \theta_{tB} - \theta^*, g_i(\theta_i) - g_i(\theta_{tB-\tau}) \rangle] - \mathbb{E}[\langle \theta_{tB} - \theta^*, \bar{g}(\theta_{tB}) - \bar{g}(\theta_{tB-\tau}) \rangle] \\ & \quad + \mathbb{E}[\langle \theta_{tB} - \theta_{tB-\tau}, g_i(\theta_{tB-\tau}) - \bar{g}(\theta_{tB-\tau}) \rangle] \\ & \stackrel{(a)}{\leq} 2R(1 + \gamma) \|\theta_i - \theta_{tB-\tau}\|_2 + 2R(1 + \gamma + \lambda C) \|\theta_{tB} - \theta_{tB-\tau}\|_2 + 2G \|\theta_{tB} - \theta_{tB-\tau}\|_2 \\ & \leq 2G^2 \sum_{j=tB-\tau}^{i-1} \alpha_j + (4 + \lambda C)G^2 \sum_{j=tB-\tau}^{tB-1} \alpha_j \\ & \stackrel{(b)}{\leq} (6 + \lambda C)G^2(\tau + B)\alpha_{tB-\tau}. \end{aligned} \quad (78)$$

Here the step (a) in the above equation follows similarly to those in (29) and (30), and (b) is due to the fact that the sequence  $\alpha_j$ 's is non-increasing.

Next, we consider the first term in (77), which can be bounded using similar steps as in the proof of Lemma 7. In particular, let  $\tau = n_1 B$ , for some positive integer  $n_1$ . We then design an auxiliary Markov chain following a fixed policy given by  $\Gamma(\phi^T \theta_{tB-\tau})$ . It can be shown that

$$\begin{aligned} & \mathbb{E}[\langle \theta_{tB-\tau} - \theta^*, g_i(\theta_{tB-\tau}) - \bar{g}(\theta_{tB-\tau}) \rangle] \\ & \leq 4G^2 m \rho^{\tau-1} + 2C|\mathcal{A}|G^3 \sum_{j=tB-\tau}^{tB-1} \sum_{i=tB-\tau}^j \alpha_i \\ & \leq 4G^2 m \rho^{\tau-1} + C|\mathcal{A}|G^3 \tau^2 \alpha_{tB-\tau}. \end{aligned} \quad (79)$$

This completes the proof.  $\square$

Now we are ready to prove Theorem 3. Following similar steps to those in the proof of Theorem 1, the error at time  $B(t+1)$  can be decomposed as follows:

$$\begin{aligned} & \mathbb{E}[\|\theta_{(t+1)B} - \theta^*\|_2^2] \\ & \leq \mathbb{E}\left[\left\|\theta_{tB} + \sum_{i=tB}^{(t+1)B-1} \alpha_i g_i(\theta_i) - \theta^*\right\|_2^2\right] \\ & = \mathbb{E}\left[\|\theta_{tB} - \theta^*\|_2^2 + 2 \sum_{i=tB}^{(t+1)B-1} \alpha_i \langle \theta_{tB} - \theta^*, g_i(\theta_i) \rangle + \left\|\sum_{i=tB}^{(t+1)B-1} \alpha_i g_i(\theta_i)\right\|_2^2\right]. \end{aligned} \quad (80)$$

The third term in (80) can be upper bounded as follows:

$$\left\|\sum_{i=tB}^{(t+1)B-1} \alpha_i g_i(\theta_i)\right\|_2^2 \leq \left(\sum_{i=tB}^{(t+1)B-1} \alpha_i G\right)^2 \leq B^2 G^2 \alpha_{tB}^2. \quad (81)$$

We then consider the second term in (80). It can be shown that

$$\begin{aligned} & \mathbb{E}[\langle \theta_{tB} - \theta^*, g_i(\theta_i) \rangle] \\ & = \mathbb{E}[\langle \theta_{tB} - \theta^*, \bar{g}(\theta_{tB}) - \bar{g}(\theta^*) \rangle] + \mathbb{E}[\langle \theta_{tB} - \theta^*, g_i(\theta_i) - \bar{g}(\theta_{tB}) \rangle], \end{aligned} \quad (82)$$

which is due to the fact that  $\bar{g}(\theta^*) = 0$ . The first term in the above equation can be upper bounded using Lemma 4, i.e.,

$$\mathbb{E}[\langle \theta_{tB} - \theta^*, \bar{g}(\theta_{tB}) - \bar{g}(\theta^*) \rangle] \leq -w_s \mathbb{E} \|\theta_{tB} - \theta^*\|_2^2. \quad (83)$$

The second term in (82) can be bounded using Lemma 8

It then follows that

$$\begin{aligned} \mathbb{E}[\|\theta_{(t+1)B} - \theta^*\|_2^2] & \leq \mathbb{E}[(1 - 2w_s B \alpha_{(t+1)B}) \|\theta_{tB} - \theta^*\|_2^2] + B^2 G^2 \alpha_{tB}^2 \\ & \quad + 2 \sum_{i=tB}^{(t+1)B-1} \alpha_i \mathbb{E}[\langle \theta_{tB} - \theta^*, g_i(\theta_i) - \bar{g}(\theta_{tB}) \rangle]. \end{aligned} \quad (84)$$

For the case with diminishing step size, i.e.,  $\alpha_t = \frac{1}{2tw}$ , it follows that

$$\begin{aligned} (t+1) \mathbb{E}[\|\theta_{(t+1)B} - \theta^*\|_2^2] & \leq t \mathbb{E}[\|\theta_{tB} - \theta^*\|_2^2] + B^2 G^2 \alpha_{tB}^2 (t+1) \\ & \quad + 2(t+1) \sum_{i=tB}^{(t+1)B-1} \alpha_i \mathbb{E}[\langle \theta_{tB} - \theta^*, g_i(\theta_i) - \bar{g}(\theta_{tB}) \rangle]. \end{aligned} \quad (85)$$

Applying the above inequality recursively, we obtain that for any  $\tau = n_1 B > 0$  where  $n_1$  is some positive integer,

$$\begin{aligned}
& T\mathbb{E}[\|\theta_{TB} - \theta^*\|_2^2] \\
& \leq \sum_{t=0}^{T-1} \left( B^2 G^2 \alpha_{tB}^2 (t+1) + 2(t+1) \sum_{i=tB}^{(t+1)B-1} \alpha_i \mathbb{E}[\langle \theta_{tB} - \theta^*, g_i(\theta_i) - \bar{g}(\theta_{tB}) \rangle] \right) \\
& \leq \frac{G^2}{2w^2} (\log T + 2) + \frac{4G^2(\tau + B)}{wB} + \frac{(6 + \lambda C)G^2(\tau + B) + C|\mathcal{A}|G^3\tau^2}{Bw^2} (\log T + 1) \\
& \quad + \frac{8G^2 m \rho^{\tau-1} T}{w}, \tag{86}
\end{aligned}$$

where we let  $\alpha_0 = \frac{1}{\sqrt{2Bw}}$ . If we further let  $\tau = \tau_0 = \inf\{nB : m\rho^{nB} \leq \alpha_{TB}\}$ , then it follows that

$$\begin{aligned}
& \mathbb{E}[\|\theta_{TB} - \theta^*\|_2^2] \\
& \leq \left( 4G^2(\tau_0 + B)w + (\log T + 1)((6 + \lambda C)G^2\tau_0 + (6.5 + \lambda C)G^2B \right. \\
& \quad \left. + C|\mathcal{A}|G^3\tau_0^2) + 4G^2/\rho + 0.5BG^2 \right) / (w^2 BT). \tag{87}
\end{aligned}$$

For the case with constant step size, i.e.,  $\alpha_t = \alpha_0 < \frac{1}{2w_s B}$ , we first show that

$$\begin{aligned}
& \mathbb{E}[\langle \theta_{tB} - \theta^*, g_i(\theta_i) - \bar{g}(\theta_{tB}) \rangle] \\
& \leq (6 + \lambda C)G^2(\tau_0 + B)\alpha_0 + 4G^2 m \rho^{\tau_0-1} + C|\mathcal{A}|G^3\tau_0^2\alpha_0, \tag{88}
\end{aligned}$$

by letting  $\tau = tB$  if  $tB \leq \tau_0$ , and  $\tau = \tau_0$  if  $tB > \tau_0$  in Lemma 8. Then, applying (84) recursively, we obtain that

$$\begin{aligned}
& \mathbb{E}[\|\theta_{TB} - \theta^*\|_2^2] \\
& \leq e^{-2w_s B \alpha_0 T} \|\theta_0 - \theta^*\|_2^2 + \frac{\alpha_0 (BG^2 + 2(6 + \lambda C)G^2(\tau_0 + B) + 8G^2/\rho + 2|\mathcal{A}|G^3\tau_0^2)}{2w_s}. \tag{89}
\end{aligned}$$
